# Supplementary material
Source: HighWire-hosted journal article supplement (http://cmajopen.ca/highwire/filestream/80809/field_highwire_adjunct_files/1/open-2013-0080-original-submission.pdf)
Supplement: open-2013-0080-original-submission.pdf [file open-2013-0080-original-submission.pdf]

1  
2  
3 1  
4  
5  
6 2  
7  
8 3  
9  
10 4  
11  
12  
13 5 **ROUTE OF HYSTERECTOMY FOR WOMEN WITH BENIGN UTERINE DISEASE**  
14  
15 6 **IN BRITISH COLUMBIA**  
16  
17 7

19  
20 8 Innie Chen,<sup>1,2</sup> Sarka Lisonkova,<sup>3</sup> Catherine Allaire,<sup>3</sup> Christina Williams,<sup>3</sup> Paul Yong,<sup>3</sup> K.S. Joseph<sup>2,3</sup>

21  
22 9 <sup>1</sup>Department of Obstetrics and Gynaecology, University of Ottawa, Ottawa, ON

23  
24 10 <sup>2</sup>School of Population and Public Health, University of British Columbia, Vancouver, BC

25  
26 11 <sup>3</sup>Department of Obstetrics and Gynaecology, University of British Columbia, Vancouver, BC  
27  
28  
29  
30  
31  
32  
33  
34  
35  
36  
37  
38  
39  
40  
41  
42  
43  
44  
45  
46  
47  
48  
49  
50  
51  
52  
53  
54  
55  
56  
57  
58  
59  
60

19 **Running head:**

20 Route of hysterectomy in British Columbia

22 **Keywords**

23 Hysterectomy, technicity, laparoscopic hysterectomy, vaginal hysterectomy.  
24

1  
2  
3 25 **ABSTRACT**  
4

5 26 **Background:** Minimally invasive hysterectomies performed vaginally or laparoscopically are  
6  
7 associated with decreased perioperative morbidity. We examine temporal trends and patient and  
8  
9 hospital factors associated with routes of hysterectomy in British Columbia.  
10  
11

12 29 **Methods:** We used a retrospective cohort design to study all women who had an elective  
13  
14 hysterectomy for a benign indication between 2007 and 2011 in any of eight hospitals in the  
15  
16 Vancouver Coastal Health and Providence Health Care regions. Logistic regression modeling  
17  
18 with mixed effects was used to estimate adjusted odds ratios and 95% confidence intervals for  
19  
20 patient factors and hospital characteristics associated with the hysterectomy approach.  
21  
22  
23

24 34 **Results:** The study included 4,372 women who underwent abdominal (52.3%), vaginal (25.5%),  
25  
26 or laparoscopic (22.3%) hysterectomy. From 2007 to 2011, abdominal hysterectomies decreased  
27  
28 from 58.4% to 47.7%; vaginal hysterectomies decreased from 27.5% to 21.1%; and laparoscopic  
29  
30 hysterectomies increased from 14.2% to 31.2% ( $p < 0.001$  for all trends). Patient factors  
31  
32 associated with laparoscopic versus abdominal hysterectomy included young age, pain or  
33  
34 prolapse indication, absence of fibroid indication, absence of concurrent gynaecologic procedure,  
35  
36 rural residence, and lower socioeconomic status. Patient factors associated with vaginal  
37  
38 hysterectomy included older age, prolapse indication, and absence of concurrent procedure for  
39  
40 prolapse. Hospital location and size were not significantly associated with vaginal hysterectomy,  
41  
42 but urban hospital location was associated with laparoscopic hysterectomy.  
43  
44

45 48 **Interpretation:** The proportion of minimally invasive hysterectomies is increasing and  
46  
47 represents approximately half of all hysterectomies in British Columbia. Vaginal hysterectomies  
48  
49 are associated with patient characteristics, while laparoscopic hysterectomies are associated with  
50  
51 patient and hospital characteristics.  
52  
53  
54  
55  
56  
57  
58  
59  
60

## 48 BACKGROUND

49  
50 Hysterectomy is the most frequently performed gynaecologic operation, with approximately  
51 50,000 being performed each year in Canada.<sup>1,2</sup> Traditionally, hysterectomies have been  
52 performed via the abdominal route, which involves a relatively large abdominal incision.  
53 However, hysterectomies performed via the vaginal route or via smaller incisions using the  
54 laparoscopic approach have been shown to be associated with significantly faster recovery and  
55 decreased operative morbidity.<sup>3-5</sup> The evidence in favour of minimally invasive hysterectomies  
56 is reflected in current national guidelines.<sup>6,7</sup> Vaginal hysterectomy is the preferred type of  
57 minimally invasive hysterectomy, but its use may be limited in cases of concurrent pelvic  
58 pathology, large uterine size, or lack of uterine descent. In these cases, the laparoscopic  
59 approach may avoid a prolonged recovery period and increased morbidity.<sup>2,8</sup> The concept of  
60 technicity - i.e., the use of a vaginal or laparoscopic approach - was introduced to measure the  
61 proportion of minimally invasive hysterectomies among all hysterectomies, and it has also been  
62 proposed as a quality indicator in gynaecologic practice.<sup>2,9</sup>  
63  
64 Despite the wealth of evidence favouring minimally invasive hysterectomies for benign  
65 gynaecologic disease, a national study on hysterectomies from 1981 to 1997 indicated that most  
66 hysterectomies in Canada were being performed abdominally,<sup>1</sup> and a recent national survey  
67 suggested that nearly forty percent of gynaecologists were not offering hysterectomy by  
68 laparoscopy.<sup>10</sup> More recent reports from Ontario<sup>11,12</sup> and Quebec<sup>13</sup> suggest that 40 to 45% of  
69 hysterectomies are performed by minimally invasive routes. However, these studies were  
70 limited by the absence of adequate information on patient and clinical factors

1  
2  
3 71 .  
4  
5  
6 72 We therefore carried out a study to examine temporal trends in minimally invasive hysterectomy  
7  
8 73 in British Columbia, Canada, and to identify patient and hospital factors associated with the  
9  
10 74 different routes of hysterectomy. In addition, we compared surgical time, length of stay in the  
11  
12 75 hospital, rehospitalisation, and emergency visit rates for each type of hysterectomy.  
13  
14  
15 76

## 17 77 **METHODS**

18  
19  
20 78  
21  
22 79 We used a population-based retrospective cohort design that included women undergoing  
23  
24 80 hysterectomy for benign gynecological conditions at any hospital in Vancouver Coastal Health  
25  
26 81 and Providence Health Care regions. Data sources included the hospitals' Discharge Abstract  
27  
28 82 Database (DAD), which was linked to the Operating Room Management Information System  
29  
30 83 (ORMIS) database, as well as the Emergency Database. These three data sources captured  
31  
32 84 demographic, hospitalization, surgical, and emergency room information for women who were  
33  
34 85 hospitalized between April 1<sup>st</sup>, 2007 and December 31<sup>st</sup>, 2011. Women with elective  
35  
36 86 hysterectomy for benign gynaecologic indications who were residents of British Columbia at the  
37  
38 87 time of surgery were included in the study.  
39  
40  
41  
42  
43 88

44  
45  
46 89 The Canadian Classification of Health Interventions (CCI) procedure codes version 10 (CCI-10)  
47  
48 90 were used to distinguish between routes of hysterectomy, and the International Classification of  
49  
50 91 Diseases version 10 (ICD-10) diagnostic codes were used to determine indication for surgery.  
51  
52 92 Hysterectomies were classified into abdominal (CCI 1RM89LA), vaginal (CCI 1RM89CA), and  
53  
54 93 laparoscopic hysterectomies (CCI 1RM89AA and 1RM89DA). Cases of partial excision of the  
55  
56  
57  
58  
59  
60

1  
2  
3 94 uterus or subtotal hysterectomy (CCI 1RM87BAGX and 1RM87CAGX for vaginal  
4  
5 95 hysterectomy; 1RM87DAGX for laparoscopic; and, 1RM87LAGX for abdominal) were only  
6  
7  
8 96 classified as hysterectomies if they were also classified as hysterectomies in the ORMIS  
9  
10 97 database. Minimally invasive hysterectomy was defined as vaginal or laparoscopic  
11  
12 98 hysterectomy. In cases where a minimally invasive hysterectomy was converted to a  
13  
14  
15 99 laparotomy, the hysterectomy was still classified according to the initial approach.  
16  
17  
18 100

19  
20 101 Patient and hospital characteristics that were considered to be associated with hysterectomy route  
21  
22 102 included age, urban or rural residence, socio-economic status, indication for hysterectomy, and  
23  
24 103 concurrent gynaecologic procedure. Rural residence was defined by residential postal codes  
25  
26  
27 104 corresponding to areas with <10,000 inhabitants.<sup>14</sup> Socio-economic status was inferred from  
28  
29 105 residential postal codes using neighbourhood income quintile (1 to 5 from lowest to highest  
30  
31 106 income level) relative to the income distribution in British Columbia in 2006. Neighbourhood  
32  
33  
34 107 income level has been considered an adequate approximation of household income in studies of  
35  
36 108 health outcomes in Canada.<sup>15</sup>  
37  
38  
39 109

40  
41 110 The indication for hysterectomy was identified from diagnoses coded by ICD-10 codes in the  
42  
43 111 DAD and categorised into the following categories: fibroids (ICD-10 D25), menstrual bleeding  
44  
45 112 disorders (N92, N93), endometriosis (N80), pain (N94), prolapse (N81), and other. Concurrent  
46  
47 113 gynecological procedures were identified from procedure codes in the DAD and the ORMIS  
48  
49 114 databases and included ovarian procedures (CCI 1RB, 1RD89), prolapse (1RS51, 1RS74,  
50  
51 115 1RS80, 1PL74, 1PL80, 1NQ74, 1NQ80), and other. Hospital characteristics included size of  
52  
53 116 hospital (<100 beds vs. ≥100 beds) and urban or rural setting according to hospital postal code.  
54  
55  
56  
57  
58  
59  
60

1  
2  
3 117 Information related to surgical outcomes, such as operative time, length of hospital stay, return to  
4  
5 118 emergency room, and readmission to hospital within 60 days after discharge was also collected.  
6  
7  
8 119 The proportion of each type of hysterectomy was calculated for each year to determine temporal  
9  
10 120 trends. Baseline patient and hospital characteristics and surgical outcomes were contrasted  
11  
12 121 between women who had vaginal, laparoscopic, and combined minimally invasive routes of  
13  
14 122 hysterectomy versus those who had an abdominal hysterectomy. Continuous variables were  
15  
16 123 compared using a t-test or Wilcoxon test to assess the statistical significance of differences,  
17  
18 124 while categorical variables were compared using chi-square or Fisher's exact test. The Cochran-  
19  
20 125 Armitage test for trend was used to assess the statistical significance of temporal trends. We  
21  
22 126 used mixed effects models with a logit link function (GLIMMIX procedure) to identify  
23  
24 127 independent predictors for different routes of hysterectomy. The results were expressed as  
25  
26 128 adjusted odds ratios (AOR) and 95% confidence intervals (95% CI). All analyses were carried  
27  
28 129 out using SAS version 9.3. (SAS Institute Inc., Cary, NC, USA) and 2 sided p-values <0.05 were  
29  
30 130 considered significant. Ethics approval for this study was granted by the University of British  
31  
32 131 Columbia Research Ethics Board.  
33  
34  
35  
36  
37  
38  
39  
40

## 41 133 **RESULTS**

42  
43 134  
44  
45 135 There were 4,372 women who had elective hysterectomy for a benign gynaecologic indication in  
46  
47 136 Vancouver Coastal Health and Providence Health Care regions of British Columbia between  
48  
49 137 April 2007 and December 2011. Overall, 52.3% of hysterectomies were abdominal, 25.5% were  
50  
51 138 vaginal, and 22.3% were laparoscopic. Taking vaginal and laparoscopic routes together, the  
52  
53 139 overall rate of minimally invasive hysterectomies was 47.7%. The proportion of abdominal  
54  
55  
56  
57  
58  
59  
60

1  
2  
3 140 hysterectomies decreased from 58.3% to 47.7%; vaginal hysterectomies decreased from 27.5%  
4  
5  
6 141 to 21.1%; while laparoscopic hysterectomies increased from 14.2% to 31.2% between 2007 and  
7  
8 142 2011. Overall, the rate of minimally invasive hysterectomies (vaginal or laparoscopic) increased  
9  
10 143 from 41.7% to 52.3% ( $p < 0.001$  for all trends) (Figure 1).  
11  
12  
13 144

145 Most women (71.0%) were between 40 and 60 years of age. Uterine fibroids were the most  
16  
17 146 common indication for hysterectomy (52.1%), followed by menstrual bleeding disorder (30.3%),  
18  
19  
20 147 prolapse (22.0%), endometriosis (21.5%), and pelvic pain (6.7%). The majority of the women  
21  
22 148 resided in urban areas (94.0%) and most hysterectomies were performed in urban settings  
23  
24 149 (95.0%). Women with laparoscopic hysterectomy were on average younger, compared to mostly  
25  
26  
27 150 older women who underwent vaginal hysterectomy. Rural residence was more common among  
28  
29 151 women with minimally invasive hysterectomies, while the abdominal approach was more likely  
30  
31 152 among women with lower socio-economic status. Fibroids were associated with abdominal  
32  
33 153 hysterectomy while prolapse was associated with a vaginal approach. Similarly, a concurrent  
34  
35 154 procedure for prolapse was more to likely to occur with a vaginal approach. Patient and hospital  
36  
37 155 characteristics by route of hysterectomy are summarized in Table 1.  
38  
39  
40  
41 156

42  
43 157 After adjustment for patient and hospital characteristics, the odds of using a minimally invasive  
44  
45 158 approach to hysterectomy increased significantly between 2007 and 2011 (25% increase in odds  
46  
47 159 per year, 96% CI 19%-32% increase, Table 2). The separate odds of either a laparoscopic or a  
48  
49 160 vaginal approach relative to an abdominal approach also increased in recent years (Table 2).  
50  
51  
52

53 161  
54  
55  
56  
57  
58  
59  
60

1  
2  
3 162 Patient factors associated with laparoscopic versus abdominal hysterectomy were young age  
4  
5 163 (AOR=4.59, 95% CI 2.10-10.0 for <30 vs. 40-49 years), rural residence (AOR=1.89, 95% CI  
6  
7  
8 164 1.28-2.78), indication of pain (AOR=2.08, 95% CI 1.53-2.83) or prolapse (AOR=3.28, 95% CI  
9  
10 165 2.14-5.03). Fibroids, (AOR=0.37, 95% CI 0.29-0.46), concurrent ovarian and prolapse  
11  
12 166 procedure (AOR=0.71, 95% CI 0.58-0.86 and AOR=0.50, 95% CI 0.29-0.85), and lower  
13  
14  
15 167 socioeconomic status (AOR=0.58, 95% CI 0.46-0.74 for lowest vs. highest quintile) were  
16  
17 168 associated with lower odds of laparoscopic versus abdominal surgery. Patient factors associated  
18  
19  
20 169 with vaginal hysterectomy were older age (AOR=1.75, 95% CI 1.05-2.92 for 60-69 vs. 40-49  
21  
22 170 years), prolapse indication (AOR=34.4, 95% CI 21.1-56.3), and concurrent procedure for  
23  
24 171 prolapse (AOR=1.68, 95% CI 1.07-2.64). After adjustment for patient characteristics, urban  
25  
26 172 hospital location was associated with laparoscopic hysterectomy (AOR=22.2, 95% CI 2.6-  
27  
28 173 192.3).

29  
30  
31  
32 174  
33  
34 175 In terms of surgical outcomes, the median operative time was significantly different between  
35  
36 176 laparoscopic hysterectomies (median 140, inter-quartile range 71 minutes), versus both  
37  
38 177 abdominal and vaginal hysterectomies (both medians 100 minutes and both inter-quartile ranges  
39  
40 178 54 minutes,  $p<0.0001$ ). Length of hospital stay was also significantly different between  
41  
42 179 abdominal, vaginal, and laparoscopic hysterectomies (median 3, 2 and 1 day, respectively, and  
43  
44 180 inter-quartile range 1,2, and 1 day, respectively,  $p<0.0001$ ). No significant differences were  
45  
46 181 observed in prolonged hospitalization, return to emergency room, or rehospitalisation (Table 3).

47  
48  
49  
50 182  
51  
52 183  
53  
54  
55 184  
56  
57  
58  
59  
60



1  
2  
3 185 **DISCUSSION**  
4

5 186  
6  
7  
8 187 More than half (52%) of hysterectomies for benign indications in Vancouver Coastal Health and  
9  
10 188 Providence Health Care regions of British Columbia, Canada, were performed using minimally  
11  
12 189 invasive techniques in 2011. This proportion had been steadily increasing from 41.7% to 52.3%  
13  
14 190 between 2007 and 2011. Patient factors associated with vaginal hysterectomy were surgery  
15  
16 191 performed more recently, older age, and vaginal prolapse, while factors associated with  
17  
18 192 laparoscopic hysterectomy were surgery performed more recently, younger age, indication of  
19  
20 193 pain or prolapse, rural residence and higher socioeconomic status. Laparoscopic approach was  
21  
22 194 less likely in the presence of fibroids, concurrent prolapse or ovarian procedure, and lower socio-  
23  
24 195 economic status. Hospital characteristics were not significantly associated with a minimally  
25  
26 196 invasive approach after adjustment for patient characteristics, except for the laparoscopic  
27  
28 197 approach, which was more likely to be performed in urban area hospitals.  
29  
30  
31  
32  
33

34 198  
35  
36 199 The observed rate of minimally invasive hysterectomy is consistent with reports from Ontario in  
37  
38 200 2007 which found a 41% rate of minimally invasive hysterectomy<sup>11,12</sup>, and studies from Quebec<sup>13</sup>  
39  
40 201 which showed a temporal rise from 39.9% in 2002-3 to 44.3% in 2008-9. In a national survey of  
41  
42 202 endoscopic practice, lack of training was identified as a major barrier to the laparoscopic  
43  
44 203 approach to hysterectomy, so the increase in minimally invasive hysterectomies in recent years  
45  
46 204 may reflect the increased exposure to laparoscopic hysterectomy in residency and fellowship  
47  
48 205 training programs, as well as initiatives to mentor existing gynaecologists. Indeed, several  
49  
50 206 mentorship programs were present in the Vancouver Coastal Health Region, and our results may  
51  
52 207 reflect the effectiveness of such initiatives. The strong association seen between urban hospitals  
53  
54  
55  
56  
57  
58  
59  
60

1  
2  
3 208 and laparoscopic hysterectomy (AOR= 22.2, CI 2.6-192.3) suggests the need for surgeon  
4  
5 209 education and mentorship programs to expand into rural areas.  
6  
7

8 210  
9  
10 211 Even though a temporal decline in vaginal hysterectomies was observed, this was not apparent  
11  
12 212 after adjustment for temporal changes in patient characteristics. The results of multivariable  
13  
14 213 analysis showed that the odds of vaginal hysterectomy increased significantly over the study  
15  
16 214 period by 12% per year (95% CI 1%-22%) compared with abdominal hysterectomy. Therefore  
17  
18 215 the crude temporal decline was likely due to changes in patient characteristics over time.  
19  
20

21 216 However, it is also possible that women with structurally normal uteri who would have been  
22  
23 217 candidates for vaginal hysterectomy benefitted from increasingly effective conservative  
24  
25 218 treatments for menstrual bleeding disorders – such as hormonal or ablative therapies – and were  
26  
27 219 less likely to require hysterectomy. This is consistent with the observation that fibroids  
28  
29 220 represented the most common indication for hysterectomy. Further, a prophylactic  
30  
31 221 salpingectomy for ovarian cancer prevention has become more common in British Columbia in  
32  
33 222 recent years. As the performance of salpingectomy by the vaginal route can be technically  
34  
35 223 challenging, it is possible that more laparoscopic rather than vaginal hysterectomies have been  
36  
37 224 performed for this purpose.  
38  
39  
40  
41  
42

43 225  
44  
45 226 Whereas it is generally accepted that patient clinical factors will determine route of  
46  
47 227 hysterectomy, the observed association between social and demographic factors and route of  
48  
49 228 hysterectomy was less expected. We observed that women with lower socioeconomic status  
50  
51 229 were less likely to undergo laparoscopic hysterectomy, after adjustment for concurrent factors.  
52  
53 230 While it is possible that the relationship between route of hysterectomy and socioeconomic status  
54  
55  
56  
57  
58  
59  
60

1  
2  
3 231 could be confounded by patient comorbidities that were not documented in the data source, the  
4  
5 232 association between rates and routes of hysterectomy and socioeconomic status, race, and  
6  
7  
8 233 geographic location has been previously documented in the literature.<sup>16-18</sup> Large variations in  
9  
10 234 routes of hysterectomy by geographic region have been observed in Ontario, with some local  
11  
12 235 health areas having a two-fold higher rate of laparoscopic hysterectomy compared with others  
13  
14 236 (63% vs. 30%). However, these studies did not find significant variation in the route of  
15  
16 237 hysterectomy with neighbourhood income or educational attainment.<sup>11,12</sup> Further population-  
17  
18 238 based studies in Canada are needed to corroborate these findings.  
19  
20

21  
22 239  
23  
24 240 The use of a population-based dataset that includes multiple hospitals within a defined  
25  
26 241 geographical areas including and urban and rural locations was a major strength of this study.  
27  
28 242 The use of standardized databases also ensured that consecutive patients were captured using  
29  
30 243 consistent data collection procedures. However, not all hospitals in the province of British  
31  
32 244 Columbia were included, and thus our analysis serves only as an estimate of the rate of  
33  
34 245 minimally invasive hysterectomy in the province. Other limitations include the lack of detailed  
35  
36 246 clinical information, including patient body-mass index and comorbid conditions. In addition,  
37  
38 247 potential underreporting and coding errors inherent in the use of hospital administrative data may  
39  
40 248 have been present.  
41  
42  
43  
44  
45

## 46 249 47 48 250 **CONCLUSION** 49

50  
51 251  
52  
53 252 Approximately half of all hysterectomies are performed using a minimally invasively approach  
54  
55 253 in British Columbia, and the frequency of minimally invasive approaches has increased  
56  
57  
58  
59  
60

1  
2  
3 254 significantly in recent years. Vaginal hysterectomies are associated with patient clinical factors,  
4  
5  
6 255 while laparoscopic hysterectomies are associated with clinical, socio-demographic, and hospital  
7  
8 256 characteristics. The association between route of hysterectomy and socioeconomic status in a  
9  
10  
11 257 Canadian population is a novel finding and warrants further study.

12  
13 258

14  
15 259 **ACKNOWLEDGEMENTS**

16  
17  
18  
19 260

20  
21 261 We are grateful to the Vancouver Coastal Health Authority Decision Support and Providence  
22  
23  
24 262 Health Care Decision Support for providing the data used in this study. Innie Chen is supported  
25  
26 263 by a Frederick Banting and Charles Best Canada Graduate Scholarship Award from the  
27  
28  
29 264 Canadian Institutes of Health Research, and K.S. Joseph is supported by a Chair in maternal,  
30  
31 265 fetal and infant health services research from the Canadian Institutes of Health Research.  
32  
33  
34  
35  
36  
37  
38  
39  
40  
41  
42  
43  
44  
45  
46  
47  
48  
49  
50  
51  
52  
53  
54  
55  
56  
57  
58  
59  
60

266 **REFERENCES**

- 267
- 268 1. Millar WJ. Hysterectomy, 1981/82 to 1996/97. *Health Rep.* 2001;12(2):9-22.
- 269 2. Laberge PY, Singh SS. Surgical approach to hysterectomy: Introducing the concept of  
270 technicity. *J Obstet Gynaecol Can.* 2009;31(11):1050-1053.
- 271 3. Nieboer TE, Johnson N, Lethaby A, et al. Surgical approach to hysterectomy for benign  
272 gynaecological disease. *Cochrane Database Syst Rev.* 2009(3):CD003677.
- 273 4. Garry R, Fountain J, Mason S, et al. The eVALuate study: Two parallel randomised trials, one  
274 comparing laparoscopic with abdominal hysterectomy, the other comparing laparoscopic with  
275 vaginal hysterectomy. *BMJ.* 2004;328(7432):129.
- 276 5. Roy KK, Goyal M, Singla S, et al. A prospective randomised study of total laparoscopic  
277 hysterectomy, laparoscopically assisted vaginal hysterectomy and non-descent vaginal  
278 hysterectomy for the treatment of benign diseases of the uterus. *Arch Gynecol Obstet.*  
279 2011;284(4):907-912.
- 280 6. ACOG committee opinion no. 444: Choosing the route of hysterectomy for benign disease.  
281 *Obstet Gynecol.* 2009;114(5):1156-1158.
- 282 7. Lefebvre G, Allaire C, Jeffrey J, et al. SOGC clinical guidelines. hysterectomy. *J Obstet*  
283 *Gynaecol Can.* 2002;24(1):37-61.

- 1  
2  
3 284 8. McCracken G, Lefebvre GG. Vaginal hysterectomy: Dispelling the myths. *J Obstet Gynaecol*  
4  
5 285 *Can.* 2007;29(5):424-428.  
6  
7  
8  
9 286 9. Al-Khaduri M, Al-Farsi Y. Technicity as a quality indicator of excellence in gynaecology.  
10  
11 287 *Sultan Qaboos Univ Med J.* 2012;12(1):93-96.  
12  
13  
14  
15 288 10. Chen I, Bajzak KI, Guo Y, et al. A national survey of endoscopic practice among  
16  
17 289 gynaecologists in canada. *J Obstet Gynaecol Can.* 2012;34(3):257-263.  
18  
19  
20  
21 290 11. Dunn S, Wise MR, Johnson LM, et al. Reproductive and Gynaecological Health. In: Bierman  
22  
23 291 AS, editor. Project for an Ontario Women's Health Evidence-Based Report: Volume 2: Toronto;  
24  
25 292 2011.  
26  
27  
28  
29 293 12. Bierman AS, editor. Project for an Ontario Women's Health Evidence-Based Report:  
30  
31 294 Volume 2: Toronto; 2010/2011.  
32  
33  
34  
35 295 13. Bernatchez-Laflamme S, Bujold E, Roberge S, Laberge PY. [Évolution de l'indice de  
36  
37 296 technicité des hystérectomies au québec.]. *J Obstet Gynaecol Can.* 2013;35(2):144-148.  
38  
39  
40  
41 297 14. Statistics Canada. Postal code conversion file (PDDF), reference guide. 2004. Catalogue no.  
42  
43 298 92F0153GIE. Available at:  
44  
45 299 <http://dsppsd.pwgsc.gc.ca/Collection/Statcan/92F0153GIE/92F0153GIE2005001.pdf>. Accessed  
46  
47 300 *April 6, 2010.*  
48  
49  
50  
51 301 15. Mustard CA, Derksen S, Berthelot JM, et al. Assessing ecologic proxies for household  
52  
53 302 income: A comparison of household and neighbourhood level income measures in the study of  
54  
55 303 population health status. *Health Place.* 1999;5(2):157-171.  
56  
57  
58  
59  
60

- 1  
2  
3 304 16. Jacoby VL, Autry A, Jacobson G, et al. Nationwide use of laparoscopic hysterectomy  
4  
5 305 compared with abdominal and vaginal approaches. *Obstet Gynecol.* 2009;114(5):1041-1048.  
6  
7  
8  
9 306 17. Abenhaim HA, Azziz R, Hu J, et al. Socioeconomic and racial predictors of undergoing  
10  
11 307 laparoscopic hysterectomy for selected benign diseases: Analysis of 341487 hysterectomies. *J*  
12  
13 308 *Minim Invasive Gynecol.* 2008;15(1):11-15.  
14  
15  
16  
17 309 18. Canadian Institute for Health Information. *Health indicators 2010.* 2010. Available at:  
18  
19 310 [https://secure.cihi.ca/free\\_products/Healthindicators2010\\_en.pdf](https://secure.cihi.ca/free_products/Healthindicators2010_en.pdf). Accessed September 6, 2013.  
20  
21  
22  
23  
24  
25  
26  
27  
28  
29  
30  
31  
32  
33  
34  
35  
36  
37  
38  
39  
40  
41  
42  
43  
44  
45  
46  
47  
48  
49  
50  
51  
52  
53  
54  
55  
56  
57  
58  
59  
60

Confidential

311 **APPENDIX:**

312

313 **FIGURE LEGENDS**

314

315 **Figure 1.** Temporal trends in elective abdominal, vaginal, laparoscopic, and minimally invasive  
316 hysterectomies for benign indications, British Columbia, 2007-2011.

317

318 **Table 1.** Patient and hospital characteristics of women with elective hysterectomies for benign  
319 indications, British Columbia, 2007-2011.

320

321 **Table 2.** Unadjusted and adjusted odds ratios for factors associated with elective vaginal,  
322 laparoscopic, and minimally invasive hysterectomy among women with benign indications,  
323 British Columbia, 2007-2011.

324

325 **Table 3.** Hospital stay, emergency visits, and rehospitalization by route of hysterectomy among  
326 women with elective hysterectomies for benign indications, British Columbia, 2007-2011.



**Figure 1.** Temporal trends in elective abdominal, vaginal, laparoscopic, and minimally invasive hysterectomies for benign indications, British Columbia, 2007-2011.

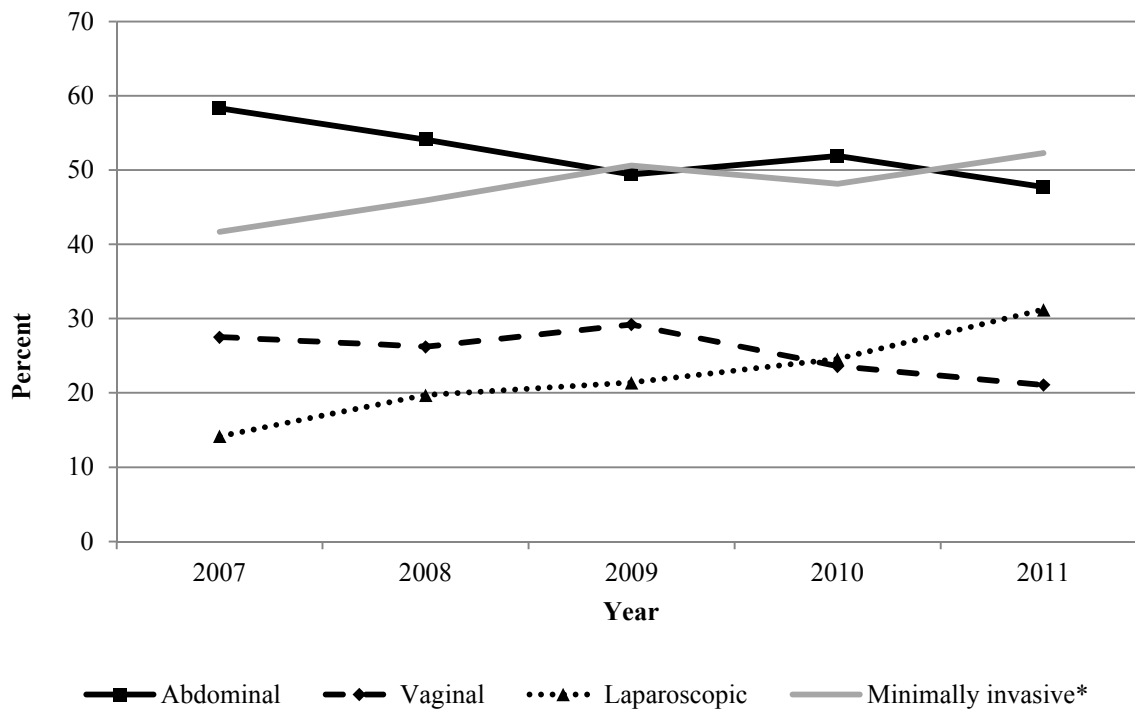

\* Minimally invasive hysterectomies include vaginal and laparoscopic hysterectomies.

1  
2  
3  
4  
5  
6  
7  
8  
9  
10  
11  
12  
13  
14  
15  
16  
17  
18  
19  
20  
21  
22  
23  
24  
25  
26  
27  
28  
29  
30  
31  
32  
33  
34  
35  
36  
37  
38  
39  
40  
41  
42  
43  
44  
45  
46  
47  
48  
49  
50  
51  
52  
53  
54  
55  
56  
57  
58  
59  
60

Confidential

**Table 1.** Patient and hospital characteristics of women with elective hysterectomies for benign indications,

| Demographic/clinical factors       | Hysterectomy approach |                           |                         | P-value         | Minimally invasive* | P-value         |
|------------------------------------|-----------------------|---------------------------|-------------------------|-----------------|---------------------|-----------------|
|                                    | Vaginal<br>N=1113 (%) | Laparoscopic<br>N=974 (%) | Abdominal<br>N=2285 (%) |                 |                     |                 |
| <b>Age (years)</b>                 |                       |                           |                         | <b>&lt;.001</b> |                     | <b>&lt;.001</b> |
| <29                                | 4 (0.36)              | 34 (3.49)                 | 10 (0.44)               |                 | 38 (1.82)           |                 |
| 30-39                              | 77 (6.92)             | 172 (17.66)               | 229 (10.02)             |                 | 249 (11.93)         |                 |
| 40-49                              | 289 (25.97)           | 508 (52.16)               | 1281 (56.06)            |                 | 797 (38.19)         |                 |
| 50-59                              | 261 (23.45)           | 184 (18.89)               | 583 (25.51)             |                 | 445 (21.32)         |                 |
| 60-69                              | 263 (23.63)           | 60 (6.16)                 | 126 (5.51)              |                 | 323 (15.48)         |                 |
| 70-79                              | 177 (15.90)           | 13 (1.33)                 | 42 (1.84)               |                 | 190 (9.1)           |                 |
| 80+                                | 42 (3.77)             | 3 (0.31)                  | 14 (0.61)               |                 | 45 (2.16)           |                 |
| <b>Rural residence</b>             | 81 (7.28)             | 73 (7.49)                 | 107 (4.68)              | <.001           | 154 (7.38)          | <.001           |
| <b>Socio-economic quintile**</b>   |                       |                           |                         | <.001           |                     | <.001           |
| 1 (lowest)                         | 302 (27.66)           | 279 (28.94)               | 813 (35.81)             |                 | 581 (28.26)         |                 |
| 2                                  | 107 (9.80)            | 106 (11.00)               | 274 (12.07)             |                 | 213 (10.36)         |                 |
| 3 (median)                         | 260 (23.81)           | 161 (16.70)               | 445 (19.60)             |                 | 421 (20.48)         |                 |
| 4                                  | 175 (16.03)           | 183 (18.98)               | 336 (14.80)             |                 | 358 (17.41)         |                 |
| 5 (highest)                        | 248 (22.71)           | 235 (24.38)               | 402 (17.71)             |                 | 483 (23.49)         |                 |
| <b>Indication (main diagnosis)</b> |                       |                           |                         |                 |                     |                 |
| Fibroids                           | 219 (19.68)           | 431 (44.25)               | 1627 (71.20)            | <.001           | 650 (31.15)         | <.001           |
| Menstrual bleeding disorder        | 225 (20.22)           | 355 (36.45)               | 745 (32.60)             | <.001           | 580 (27.79)         | <.001           |
| Endometriosis                      | 72 (6.47)             | 272 (27.93)               | 595 (26.04)             | <.001           | 344 (16.48)         | <.001           |
| Pain                               | 48 (4.31)             | 126 (12.94)               | 120 (5.25)              | <.001           | 174 (8.34)          | <.001           |
| Prolapse                           | 801 (71.97)           | 77 (7.91)                 | 82 (3.59)               | <.001           | 878 (42.07)         | <.001           |
| Other                              | 70 (6.29)             | 189 (19.40)               | 252 (11.03)             | <.001           | 259 (12.41)         | 0.16            |
| <b>Concurrent procedure</b>        |                       |                           |                         |                 |                     |                 |
| Ovarian procedure                  | 113 (10.15)           | 500 (51.33)               | 1236 (54.09)            | <.001           | 613 (29.37)         | <.001           |
| Prolapse                           | 801 (71.97)           | 95 (9.75)                 | 159 (6.96)              | <.001           | 896 (42.93)         | <.001           |
| Other/none                         | 268 (24.08)           | 443 (45.48)               | 971 (42.49)             | <.001           | 711 (34.07)         | <.001           |
| <b>Hospital characteristics</b>    |                       |                           |                         |                 |                     |                 |
| Large hospital ( $\geq 100$ beds)  | 829 (74.48)           | 573 (58.83)               | 1609 (70.42)            | <.001           | 1402 (67.18)        | 0.02            |
| Urban area location                | 1000 (89.85)          | 970 (99.59)               | 2185 (95.62)            | <.001           | 1970 (94.39)        | 0.06            |

\* Minimally invasive hysterectomies include vaginal and laparoscopic hysterectomies.

\*\* Derived from the residential postal codes.

P-values based on chi-square test.

**Table 2.** Unadjusted and adjusted odds ratios for factors associated with elective vaginal, laparoscopic, and minimally invasive hysterectomy among women with benign indications, British Columbia, 2007-2011.

| Demographic/clinical factors       | Vaginal*         |                  | Laparoscopic*    |                  | Minimally invasive* |                  |
|------------------------------------|------------------|------------------|------------------|------------------|---------------------|------------------|
|                                    | OR (95% CI)      | AOR (95% CI)     | OR (95% CI)      | AOR (95% CI)     | OR (95% CI)         | AOR (95% CI)     |
| <b>Year</b>                        | 0.98 (0.93-1.04) | 1.12 (1.02-1.22) | 1.25 (1.18-1.32) | 1.32 (1.24-1.40) | 1.10 (1.05-1.15)    | 1.25 (1.19-1.32) |
| <b>Age (years)</b>                 |                  |                  |                  |                  |                     |                  |
| ≤29                                | 1.77 (0.55-5.69) | 1.11 (0.26-4.69) | 8.57 (4.20-17.5) | 4.59 (2.10-10.0) | 6.11 (3.03-12.3)    | 3.77 (1.78-7.95) |
| 30-39                              | 1.49 (1.12-1.99) | 0.87 (0.59-1.31) | 1.89 (1.52-2.37) | 1.30 (1.01-1.68) | 1.75 (1.43-2.14)    | 1.24 (0.98-1.56) |
| 40-49                              | Ref.             | Ref.             | Ref.             | Ref.             | Ref.                | Ref.             |
| 50-59                              | 1.98 (1.64-2.41) | 1.25 (0.89-1.75) | 0.80 (0.66-0.97) | 0.77 (0.61-0.96) | 1.23 (1.05-1.43)    | 0.89 (0.73-1.09) |
| 60-69                              | 9.25 (7.22-11.8) | 1.75 (1.05-2.92) | 1.20 (0.87-1.66) | 0.66 (0.44-0.98) | 4.12 (3.29-5.16)    | 0.91 (0.65-1.27) |
| ≥70                                | 17.3 (12.6-23.9) | 1.74 (0.94-3.22) | 0.72 (0.41-1.27) | 0.33 (0.17-0.61) | 6.75 (4.97-9.15)    | 0.78 (0.51-1.21) |
| <b>Rural residence</b>             | 1.60 (1.19-2.15) | 1.12 (0.63-2.01) | 1.65 (1.21-2.24) | 1.89 (1.28-2.78) | 1.62 (1.26-2.09)    | 1.62 (1.14-2.29) |
| <b>Socio-economic quintile**</b>   |                  |                  |                  |                  |                     |                  |
| 1 (lowest)                         | 0.58 (0.47-0.71) | 0.81 (0.56-1.16) | 0.58 (0.47-0.72) | 0.58 (0.46-0.74) | 0.58 (0.49-0.69)    | 0.62 (0.50-0.77) |
| 2                                  | 0.61 (0.46-0.79) | 0.76 (0.46-1.24) | 0.66 (0.50-0.87) | 0.58 (0.43-0.80) | 0.63 (0.51-0.79)    | 0.58 (0.43-0.77) |
| 3 (median)                         | 0.91 (0.73-1.13) | 1.07 (0.70-1.64) | 0.62 (0.49-0.78) | 0.67 (0.50-0.89) | 0.77 (0.64-0.92)    | 0.74 (0.58-0.96) |
| 4                                  | 0.81 (0.64-1.03) | 0.87 (0.58-1.29) | 0.93 (0.73-1.18) | 0.86 (0.66-1.11) | 0.86 (0.71-1.05)    | 0.86 (0.68-1.09) |
| 5 (highest)                        | Ref.             | Ref.             | Ref.             | Ref.             | Ref.                | Ref.             |
| <b>Indication (main diagnosis)</b> |                  |                  |                  |                  |                     |                  |
| Fibroids                           | 0.23 (0.18-0.3)  | 0.24 (0.18-0.33) | 0.37 (0.3-0.45)  | 0.37 (0.29-0.46) | 0.31 (0.26-0.37)    | 0.31 (0.26-0.38) |
| Menstrual disorders                | Ref.             | Ref.             | Ref.             | Ref.             | Ref.                | Ref.             |
| Prolapse                           | 33.9 (25.1-45.7) | 34.4 (21.1-56.3) | 1.76 (1.24-2.50) | 3.28 (2.14-5.03) | 12.3 (9.47-16.0)    | 9.85 (6.85-14.2) |
| Endometriosis                      | 0.37 (0.27-0.51) | 0.74 (0.51-1.07) | 1.02 (0.84-1.23) | 0.95 (0.77-1.17) | 0.80 (0.67-0.95)    | 0.95 (0.78-1.15) |
| Pain                               | 1.70 (1.12-2.57) | 1.53 (0.95-2.46) | 2.20 (1.66-2.91) | 2.08 (1.53-2.83) | 2.02 (1.55-2.63)    | 1.89 (1.42-2.52) |
| Other                              | 0.66 (0.46-0.96) | 1.81 (1.14-2.89) | 1.11 (0.84-1.46) | 1.37 (1.00-1.87) | 0.92 (0.72-1.18)    | 1.34 (1.02-1.78) |
| <b>Concurrent procedure</b>        |                  |                  |                  |                  |                     |                  |
| Ovarian procedure                  | 0.33 (0.26-0.42) | 0.08 (0.05-0.12) | 0.89 (0.76-1.03) | 0.71 (0.58-0.86) | 0.68 (0.59-0.78)    | 0.42 (0.36-0.51) |
| Prolapse                           | 34.0 (26.0-44.5) | 1.68 (1.07-2.64) | 0.87 (0.57-1.34) | 0.50 (0.29-0.85) | 13.4 (10.4-17.2)    | 2.28 (1.59-3.26) |
| Other/none                         | Ref.             | Ref.             | Ref.             | Ref.             | Ref.                | Ref.             |

---

**Hospital characteristics**

|                                   |                  |                  |                  |                  |                  |                  |
|-----------------------------------|------------------|------------------|------------------|------------------|------------------|------------------|
| Large hospital ( $\geq 100$ beds) | 1.23 (1.04-1.44) | 2.09 (0.19-22.7) | 0.60 (0.51-0.70) | 0.47 (0.08-2.67) | 0.86 (0.76-0.98) | 0.66 (0.19-2.29) |
| Urban area location               | 0.41 (0.54-0.31) | 0.25 (0.02-3.18) | 11.1 (30.3-4.07) | 22.2 (2.6-192.3) | 0.77 (0.59-1.01) | 1.84 (0.47-7.32) |

---

\* Minimally invasive hysterectomies include vaginal and laparoscopic hysterectomies.

\*\* Derived from the residential postal codes.

Odds ratios relative to abdominal hysterectomy.

Confidential

1  
2  
3  
4  
5  
6  
7  
8  
9  
10  
11  
12  
13  
14  
15  
16  
17  
18  
19  
20  
21  
22  
23  
24  
25  
26  
27  
28  
29  
30  
31  
32  
33  
34  
35  
36  
37  
38  
39  
40  
41  
42  
43  
44  
45  
46  
47  
48  
49  
50  
51  
52  
53  
54  
55  
56  
57  
58  
59  
60

**Table 3.** Hospital stay, emergency visits, and rehospitalization by route of hysterectomy among women with elective hysterectomies for benign indications, British Columbia, 2007-2011.

| Surgery outcomes       | Hysterectomy approach |                           |                         | P-value | Minimally invasive* | P-value |
|------------------------|-----------------------|---------------------------|-------------------------|---------|---------------------|---------|
|                        | Vaginal<br>N=1113 (%) | Laparoscopic<br>N=974 (%) | Abdominal<br>N=2285 (%) |         |                     |         |
| Hospital stay > 7 days | 6 (0.54)              | 2 (0.21)                  | 14 (0.61)               | 0.317   | 8 (0.38)            | 0.285   |
| Return to emergency    | 21 (1.89)             | 31 (3.18)                 | 67 (2.93)               | 0.129   | 52 (2.49)           | 0.371   |
| Hospital readmission   | 30 (2.70)             | 43 (4.41)                 | 99 (4.33)               | 0.048   | 73 (3.5)            | 0.156   |

\* Minimally invasive hysterectomies include vaginal and laparoscopic hysterectomies.

Confidential
